# Supplementary material
Source: PubMed Central journal article supplement (PMC6256277)
Supplement: aps2017150x1.pdf [file aps2017150x1.pdf]

Table 1 Pearson correlation analysis of gene expression and retinoic acid production

| Gene    | pearson correlation | P value |
|---------|---------------------|---------|
| UGT2A3  | 0.697               | 0.055   |
| CYP2B1  | 0.427               | 0.291   |
| CYP3A18 | 0.692               | 0.057   |
